# Supplementary material for: Involvement of Acquired Tobramycin Resistance in the Shift to the Viable but Non-Culturable State in Pseudomonas aeruginosa
Source: MDPI journal article supplement (doi:10.3390/ijms241411618), 2023-07-18
Supplement: s1 [file s1]

Supplementary Table S2. Nucleotide substitutions in Toxin/Antitoxin modules of *P. aeruginosa* C30 and AR86 compared to the reference *P. aeruginosa* PAO1 sequences

| <i>P. aeruginosa</i> strain | Locus tag | Protein family     | Nucleotide substitutions                                                                                                                                                                                                                                             |
|-----------------------------|-----------|--------------------|----------------------------------------------------------------------------------------------------------------------------------------------------------------------------------------------------------------------------------------------------------------------|
| C30<br>AR86                 | PA0124    | relElike_domain    | c.1110295C>T.<br>c.143585T>C; c.143806C>T.                                                                                                                                                                                                                           |
| C30<br>AR86                 | PA0125    | relB               | c.1111021T>C; c.1111461C>T; c.1111648T>C; c.1111655C>T; c.1111754A>G; c.1111837C>T; 1111857C>G;<br>c.1112090T>C; c.1112134T>C.<br>c.143989T>G.                                                                                                                       |
| C30<br>AR86                 | PA0249    | NULL               | /                                                                                                                                                                                                                                                                    |
| C30<br>AR86                 | PA0250    | NULL               | /                                                                                                                                                                                                                                                                    |
| C30<br>AR86                 | PA0250    | NULL               | c.282695C>T; c.282697C>G.<br>c.282611G>T.                                                                                                                                                                                                                            |
| C30<br>AR86                 | PA1030    | COG5654like_domain | c.1116674A>G; c.1116694C>G; c.1116868C>T; c.1116892C>T; c.1116920C>T; c.1116964C>T; c.1116984T>C;<br>c.1117141A>G.<br>c.1116674A>G; c.1116694C>G; c.1116920C>T; C.1116984T>C; c.1117060C>G; c.1117133G>A; c.1117143C>G.                                              |
| C30<br>AR86                 | PA1029    | Xrelike_domain     | c.1116285T>C.<br>c.1116171C>T; c.1116213_1116214insC; c.1116285T>C; c.1116332A>G.                                                                                                                                                                                    |
| C30<br>AR86                 | PA1227    | HipAlike_domain    | c.1329425G>A; c.1329461C>T; c.1329504T>C; c.1329533A>G; c.1329538C>A; c.1329593T>C; c.1329594G>A;<br>c.1329983C>G.<br>c.1329214T>C; c.1329593T>C; c.1329594G>A; c.1329983C>G.                                                                                        |
| C30<br>AR86                 | PA1226    | Xrelike_domain     | c.1328552T>C; c.1328652T>C; c.1328667C>T; c.1328673A>T; c.1328835C>T; c.1328880C>A.<br>c.1328552T>C.                                                                                                                                                                 |
| C30<br>AR86                 | PA1878    | PINlike_domain     | c.2048586A>G; c.2048810C>T; c.2048828A>C.<br>c.2048828A>C.                                                                                                                                                                                                           |
| C30<br>AR86                 | PA1879    | Xrelike_domain     | /                                                                                                                                                                                                                                                                    |
| C30<br>AR86                 | PA2083    | NULL               | /                                                                                                                                                                                                                                                                    |
| C30<br>AR86                 | PA2083    | NULL               | c.2292197A>G; c.2292242G>C; c.2292253G>C; c.2292483T>C; c.2292486C>T; c.2292495A>G; c.2292567T>C;<br>c.2292744C>T; c.2293046G>T.<br>c.2292197A>G; c.2292242G>C; c.2292253G>C; c.2292483T>C; c.2292486C>T; c.2292495A>G; c.2292567T>C;<br>c.2292744C>T; c.2293046C>T. |
| C30<br>AR86                 | PA2082    | NULL               | c.2291277A>G; c.2291304G>A.<br>c.2291277A>G.                                                                                                                                                                                                                         |

|             |        |                 |                                                                                                                                                                                                           |
|-------------|--------|-----------------|-----------------------------------------------------------------------------------------------------------------------------------------------------------------------------------------------------------|
| C30<br>AR86 | PA2271 | NULL            | /                                                                                                                                                                                                         |
| C30<br>AR86 | PA2270 | NULL            | c.2500625C>T; c.2500919G>C.<br>c.2500919G>T.                                                                                                                                                              |
| C30<br>AR86 | PA2578 | NULL            | c.2914421A>G; c.2914432G>A; c.2914666T>C; c.2914703A>G.<br>c.2914421A>G; c.2914432G>A; c.291666T>C; c.2914794C>A.                                                                                         |
| C30<br>AR86 | PA2577 | NULL            | c.2913930T>C; c.2914044G>A; c.2914056C>T.<br>/                                                                                                                                                            |
| C30<br>AR86 | PA2693 | NULL            | c.3047574C>T.<br>/                                                                                                                                                                                        |
| C30<br>AR86 | PA2692 | NULL            | c.3046513T>C.<br>c.3046513T>C.                                                                                                                                                                            |
| C30<br>AR86 | PA3248 | NULL            | c.3635449A>G.<br>c.3635139A>G; c.3635143C>G; c.3635260G>T; c.3635341C>T; c.3635395T>C; c.3635410T>C; c.3635449A>G.                                                                                        |
| C30<br>AR86 | PA3249 | NULL            | c.3636069G>A; c.3636072A>G; c.3636102T>C.<br>c.3635614C>T; c.3635643G>A; c.3635703C>G; c.3635799T>C; c.3635883G>A; c.3636072A>G; c.3636102T>C.                                                            |
| C30<br>AR86 | PA3270 | GNATlike_domain | c.3659496C>T; c.3659529A>G.<br>c.3659496C>T; c.3659529A>G.                                                                                                                                                |
| C30<br>AR86 | PA3269 | Xrelike_domain  | c.3658257G>T; c.3658258A>G; c.3658269T>C; c.3658359C>T; c.3658569A>G; c.3658646C>T; c.3658653A>G;<br>c.3658681T>C; c.3658731G>A; c.3658761G>A; c.3658767C>T; c.3658815T>C.<br>c.3658681T>C; c.3658761G>A. |
| C30<br>AR86 | PA4136 | NULL            | c.4625122C>T; c.4625343G>A; c.4625347G>C; c.4626034G>A; c.4626192G>A; c.4626193G>A; c.4626270C>G.<br>c.4625178C>T; c.4625344C>G; c.4626031G>A; c.4626270C>G.                                              |
| C30<br>AR86 | PA4135 | NULL            | c.4624911A>G; c.4624932G>A.<br>/                                                                                                                                                                          |
| C30<br>AR86 | PA4355 | NULL            | c.4883327G>A; c.4883507A>G.<br>/                                                                                                                                                                          |
| C30<br>AR86 | PA4354 | NULL            | c.4882226A>G; c.4882292C>T.<br>c.4882226A>G; c.4882292C>T.                                                                                                                                                |

/= no substitution found
