# Supplementary material for: Involvement of Acquired Tobramycin Resistance in the Shift to the Viable but Non-Culturable State in Pseudomonas aeruginosa
Source: MDPI journal article supplement (doi:10.3390/ijms241411618), 2023-07-18
Supplement: s1 [file s1]

Supplementary Table S1. Tobramycin (TOB) and Carbonyl Cyanide 3-Chlorophenylhydrazone (CCCP) Minimum Inhibitory Concentrations (MICs) against the *P. aeruginosa* strains used in this study

| <i>P. aeruginosa</i> strain | MIC         |           |                         |
|-----------------------------|-------------|-----------|-------------------------|
|                             | TOB (μg/ml) | CCCP (μM) | TOB+CCCP 100 μM (μg/ml) |
| PAO1-N                      | 1           | >400      | 2                       |
| C30                         | 16          | 400       | 2                       |
| AR86                        | 256         | 400       | 512                     |
